# Supplementary material for: Comparative phylotranscriptomics reveals ancestral and derived root nodule symbiosis programmes
Source: Springer Nature journal article supplement (doi:10.1038/s41477-023-01441-w), 2023-06-15
Supplement: MOESM1 [file 41477_2023_1441_MOESM1_ESM.pdf]

Reporting Summary

Nature Portfolio wishes to improve the reproducibility of the work that we publish. This form provides structure for consistency and transparency in reporting. For further information on Nature Portfolio policies, see our [Editorial Policies](#) and the [Editorial Policy Checklist](#).

Statistics

For all statistical analyses, confirm that the following items are present in the figure legend, table legend, main text, or Methods section.

|                                     |                                                                                                                                                                                                                                                                                     |
|-------------------------------------|-------------------------------------------------------------------------------------------------------------------------------------------------------------------------------------------------------------------------------------------------------------------------------------|
| n/a                                 | Confirmed                                                                                                                                                                                                                                                                           |
| <input type="checkbox"/>            | <input checked="" type="checkbox"/> The exact sample size ( <i>n</i> ) for each experimental group/condition, given as a discrete number and unit of measurement                                                                                                                    |
| <input type="checkbox"/>            | <input checked="" type="checkbox"/> A statement on whether measurements were taken from distinct samples or whether the same sample was measured repeatedly                                                                                                                         |
| <input type="checkbox"/>            | <input checked="" type="checkbox"/> The statistical test(s) used AND whether they are one- or two-sided<br><i>Only common tests should be described solely by name; describe more complex techniques in the Methods section.</i>                                                    |
| <input checked="" type="checkbox"/> | <input type="checkbox"/> A description of all covariates tested                                                                                                                                                                                                                     |
| <input type="checkbox"/>            | <input checked="" type="checkbox"/> A description of any assumptions or corrections, such as tests of normality and adjustment for multiple comparisons                                                                                                                             |
| <input checked="" type="checkbox"/> | <input type="checkbox"/> A full description of the statistical parameters including central tendency (e.g. means) or other basic estimates (e.g. regression coefficient) AND variation (e.g. standard deviation) or associated estimates of uncertainty (e.g. confidence intervals) |
| <input type="checkbox"/>            | <input checked="" type="checkbox"/> For null hypothesis testing, the test statistic (e.g. <i>F</i> , <i>t</i> , <i>r</i> ) with confidence intervals, effect sizes, degrees of freedom and <i>P</i> value noted<br><i>Give <i>P</i> values as exact values whenever suitable.</i>   |
| <input checked="" type="checkbox"/> | <input type="checkbox"/> For Bayesian analysis, information on the choice of priors and Markov chain Monte Carlo settings                                                                                                                                                           |
| <input type="checkbox"/>            | <input checked="" type="checkbox"/> For hierarchical and complex designs, identification of the appropriate level for tests and full reporting of outcomes                                                                                                                          |
| <input checked="" type="checkbox"/> | <input type="checkbox"/> Estimates of effect sizes (e.g. Cohen's <i>d</i> , Pearson's <i>r</i> ), indicating how they were calculated                                                                                                                                               |

Our web collection on [statistics for biologists](#) contains articles on many of the points above.

Software and code

Policy information about [availability of computer code](#)

|                 |                                                                                                                                                                                                                                                                                                                                                                                                                                                                                                                                                                                                                                                                                                                                                                                                                                                                                                                                                                                                                                                                                                                                                                                                                                                                                                                                                                                                                                                                                                                                                                                                                                                                                                                                                                                                                                                                                                                                                                                                                                                                                                                                                                                                                                                                                                                                                                                                                                                                                                                                                                                                                                                                                                      |
|-----------------|------------------------------------------------------------------------------------------------------------------------------------------------------------------------------------------------------------------------------------------------------------------------------------------------------------------------------------------------------------------------------------------------------------------------------------------------------------------------------------------------------------------------------------------------------------------------------------------------------------------------------------------------------------------------------------------------------------------------------------------------------------------------------------------------------------------------------------------------------------------------------------------------------------------------------------------------------------------------------------------------------------------------------------------------------------------------------------------------------------------------------------------------------------------------------------------------------------------------------------------------------------------------------------------------------------------------------------------------------------------------------------------------------------------------------------------------------------------------------------------------------------------------------------------------------------------------------------------------------------------------------------------------------------------------------------------------------------------------------------------------------------------------------------------------------------------------------------------------------------------------------------------------------------------------------------------------------------------------------------------------------------------------------------------------------------------------------------------------------------------------------------------------------------------------------------------------------------------------------------------------------------------------------------------------------------------------------------------------------------------------------------------------------------------------------------------------------------------------------------------------------------------------------------------------------------------------------------------------------------------------------------------------------------------------------------------------------|
| Data collection | n/a                                                                                                                                                                                                                                                                                                                                                                                                                                                                                                                                                                                                                                                                                                                                                                                                                                                                                                                                                                                                                                                                                                                                                                                                                                                                                                                                                                                                                                                                                                                                                                                                                                                                                                                                                                                                                                                                                                                                                                                                                                                                                                                                                                                                                                                                                                                                                                                                                                                                                                                                                                                                                                                                                                  |
| Data analysis   | <p>PacBio SMRT Link v6.0 and v7.0; Canu v1.8; minimap2; Bionano Genomics Access</p> <p>Custom code for statistical analyses conducted on R: <a href="https://github.com/CyrilLibourel/Universal_nodulation_transcriptomic_response">https://github.com/CyrilLibourel/Universal_nodulation_transcriptomic_response</a>.</p> <p>R packages used: R version 4.2.2 ; ade4_1.7-22; adegnet_2.1.10; ape_5.6-2; aplot_0.1.9; assertthat_0.2.1; backports_1.4.1; bio3d_2.4-4; BiocGenerics_0.44.0; BiocManager_1.30.19; BiocParallel_1.32.5; Biostrings_2.66.0; bit_4.0.5; bit64_4.0.5; bitops_1.0-7; blob_1.2.3; broom_1.0.3; cachem_1.0.6; castor_1.7.6; cellranger_1.1.0; circlize_0.4.15; cli_3.6.0; clue_0.3-64; cluster_2.1.4; clusterGeneration_1.3.7; coda_0.19-4; codetools_0.2-19; colorspace_2.1-0; combinat_0.0-8; compiler_4.2.2; ComplexHeatmap_2.14.0; corpcor_1.6.1; crayon_1.5.2; data.table_1.14.6; DBI_1.1.3; dbplyr_2.3.0; DECIPHER_2.26.0; digest_0.6.31; doParallel_1.0.17; ellipse_0.4.3; ellipsis_0.3.2; expm_0.999-7; fansi_1.0.4; fastmap_1.1.0; fastmatch_1.1-3; forcats_1.0.0; foreach_1.5.2; formatR_1.14; fs_1.6.1; futile.logger_1.4.3; futile.options_1.0.1; gargle_1.3.0; gaston_1.5.9; generics_0.1.3; GenomeInfoDbData_1.2.9; GetoptLong_1.0.5; ggfun_0.0.9; ggplot2_3.4.1; ggplotify_0.1.0; ggrepel_0.9.3; GlobalOptions_0.1.2; glue_1.6.2; googledrive_2.0.0; googlesheets4_1.0.; gridExtra_2.3; gridGraphics_0.5-1; gtable_0.3.1; haven_2.5.1; hms_1.1.2; htmltools_0.5.4; httpuv_1.6.8; httr_1.4.4; igraph_1.4.0; IRanges_2.32.0; iterators_1.0.14; jsonlite_1.8.4; lambda.r_1.2.4; later_1.3.0; lazyeval_0.2.2; lifecycle_1.0.3; lubridate_1.9.2; magrittr_2.0.3; maps_3.4.1; MASS_7.3-58.2; Matrix_1.5-3; matrixStats_0.63.0; memoise_2.0.1; mgcv_1.8-41; mime_0.12; mixOmics_6.22.0; mnormt_2.1.1; modelr_0.1.10; munsell_0.5.0; naturalsort_0.1.3; nlme_3.1-162; numDeriv_2016.8-1.1; optimParallel_1.0-2; patchwork_1.1.2; permute_0.9-7; phangorn_2.11.1; phylobase_0.8.10; phytools_1.2-0; pillar_1.8.1; pkgconfig_2.0.3; plotrix_3.8-2; plyr_1.8.8; png_0.1-8; prettyunits_1.1.1; progress_1.2.2; promises_1.2.0.1; quadprog_1.5-8; R6_2.5.1; RARPACK_0.11-0; RColorBrewer_1.1-3; RCurl_1.98-1.10; readr_2.1.4; readxl_1.4.2; repress_2.0.2; reshape2_1.4.4; rjson_0.2.21; rlang_1.0.6; rnl_0.8.7; RNeXML_2.4.11; RSpectra_0.16-1; RSQLite_2.2.20; rstudioapi_0.14; rvest_1.0.3; S4Vectors_0.36.1; scales_1.2.1; scatterplot3d_0.3-42; seqinr_4.2-23; shape_1.4.6; shiny_1.7.4; splines_4.2.2; stringi_1.7.12; stringr_1.5.0; tibble_3.1.8; tidyr_1.3.0; tidyselect_1.2.0; tidytree_0.4.2; tidyverse_1.3.2; timechange_0.2.0; tools_4.2.2; treeio_1.22.0;</p> |

tzdb\_0.3.0; UpSetR\_1.4.0; utf8\_1.2.3; uuid\_1.1.0; vctrs\_0.5.2; vegan\_2.6-4; VennDiagram\_1.7.3; wesanderson\_0.3.6; withr\_2.5.0; XML\_3.99-0.13; xml2\_1.3.3; xtable\_1.8-4; XVector\_0.38.0; yulab.utils\_0.0.6; zlibbioc\_1.44.0.  
 Structural annotation: Eukaryote EuGene pipeline egn-ep v1.5.1; EuGene v4.2a.  
 Other comparative genomics and RNAseq analyses: cutadapt v2.1; TrimGalore v0.6.5 and v0.6.6; HISAT2 v2.1.0; SAMtools v1.9 and v1.10; gffread v0.11.6 and v0.12.1; DRAP pipeline v1.92; nextflow v20.11.0; nf-core/rnaseq v3.0; bedtools v2.29.2; bioconductor-summarizedexperiment v1.20.0; bioconductor-tximeta v1.8.0; picard v2.23.9; salmon v1.4.0; star v2.6.1d; stringtie v2.1.4; ucsc v377; R v3.6.1 and v4.1.2; DiCoExpress; OrthoFinder v2.5.2; mafft v7.313; fasttree v2.1.10.

For manuscripts utilizing custom algorithms or software that are central to the research but not yet described in published literature, software must be made available to editors and reviewers. We strongly encourage code deposition in a community repository (e.g. GitHub). See the Nature Portfolio [guidelines for submitting code & software](#) for further information.

## Data

Policy information about [availability of data](#)

All manuscripts must include a [data availability statement](#). This statement should provide the following information, where applicable:

- Accession codes, unique identifiers, or web links for publicly available datasets
- A description of any restrictions on data availability
- For clinical datasets or third party data, please ensure that the statement adheres to our [policy](#)

PRJNA787464  
 SRP349803  
[https://bbri-pipelines.toulouse.inra.fr/myGenomeBrowser?browse=1&portalName=Mimpud\\_MpudA1P6v1&owner=cyril.libourel@univ-tlse3.fr&key=PKSPKBW9](https://bbri-pipelines.toulouse.inra.fr/myGenomeBrowser?browse=1&portalName=Mimpud_MpudA1P6v1&owner=cyril.libourel@univ-tlse3.fr&key=PKSPKBW9)

## Human research participants

Policy information about [studies involving human research participants and Sex and Gender in Research](#).

|                             |                                  |
|-----------------------------|----------------------------------|
| Reporting on sex and gender | <input type="text" value="n/a"/> |
| Population characteristics  | <input type="text" value="n/a"/> |
| Recruitment                 | <input type="text" value="n/a"/> |
| Ethics oversight            | <input type="text" value="n/a"/> |

Note that full information on the approval of the study protocol must also be provided in the manuscript.

## Field-specific reporting

Please select the one below that is the best fit for your research. If you are not sure, read the appropriate sections before making your selection.

☒ Life sciences ☐ Behavioural & social sciences ☐ Ecological, evolutionary & environmental sciences

For a reference copy of the document with all sections, see [nature.com/documents/nr-reporting-summary-flat.pdf](https://nature.com/documents/nr-reporting-summary-flat.pdf)

## Life sciences study design

All studies must disclose on these points even when the disclosure is negative.

|                 |                                                                                                                                                                                                                                                                           |
|-----------------|---------------------------------------------------------------------------------------------------------------------------------------------------------------------------------------------------------------------------------------------------------------------------|
| Sample size     | <input type="text" value="n/a"/>                                                                                                                                                                                                                                          |
| Data exclusions | <input type="text" value="No data were excluded from the analyses."/>                                                                                                                                                                                                     |
| Replication     | <input type="text" value="Three or four biological replicates were performed for each expression profile analyses, which is the standard in expression profile analyses by RNAseq. Expression profiles were consistent across the three or four biological replicates."/> |
| Randomization   | <input type="text" value="Samples were collected from multiple independent experiments, with plants grown randomly in different places of the growth chamber and inoculated with different sets of strains."/>                                                            |
| Blinding        | <input type="text" value="Blinding was not relevant for RNAseq data, since sample collection, RNA sequencing and statistical analyses were performed independently and with standardized procedures."/>                                                                   |

# Reporting for specific materials, systems and methods

We require information from authors about some types of materials, experimental systems and methods used in many studies. Here, indicate whether each material, system or method listed is relevant to your study. If you are not sure if a list item applies to your research, read the appropriate section before selecting a response.

## Materials & experimental systems

| n/a                                 | Involved in the study                                  |
|-------------------------------------|--------------------------------------------------------|
| <input checked="" type="checkbox"/> | <input type="checkbox"/> Antibodies                    |
| <input checked="" type="checkbox"/> | <input type="checkbox"/> Eukaryotic cell lines         |
| <input checked="" type="checkbox"/> | <input type="checkbox"/> Palaeontology and archaeology |
| <input checked="" type="checkbox"/> | <input type="checkbox"/> Animals and other organisms   |
| <input checked="" type="checkbox"/> | <input type="checkbox"/> Clinical data                 |
| <input checked="" type="checkbox"/> | <input type="checkbox"/> Dual use research of concern  |

## Methods

| n/a                                 | Involved in the study                           |
|-------------------------------------|-------------------------------------------------|
| <input checked="" type="checkbox"/> | <input type="checkbox"/> ChIP-seq               |
| <input checked="" type="checkbox"/> | <input type="checkbox"/> Flow cytometry         |
| <input checked="" type="checkbox"/> | <input type="checkbox"/> MRI-based neuroimaging |
